# Supplementary material for: Adsorptive fractionation of extracellular polymeric substances on iron oxyhydroxides: impact on copper binding
Source: Royal Society of Chemistry journal article supplement (doi:10.1039/d5em00601e), 2025-01-01
Supplement: d5em00601e1.pdf [file d5em00601e1.pdf]

## **Supplementary Material**

### **Adsorptive Fractionation of Extracellular Polymeric Substances on Iron Oxyhydroxides: Impact on Copper Binding**

Dan Luo <sup>a,b,#</sup>, Sipei Yang <sup>a,b,#</sup>, Haoyang Wang <sup>a,b</sup>, Zhibin Wu <sup>a,b</sup>, Xiaomin Gong <sup>a,b</sup>, Yuan Yang<sup>a,b</sup>,  
Yunshan Liang <sup>a,b\*</sup>, Yaoyu Zhou <sup>a,b</sup>

<sup>a</sup> Hunan Provincial Key Laboratory of Rural Ecosystem Health in Dongting Lake Area, College of  
Environment and Ecology, Hunan Agricultural University, Changsha, Hunan 410128, China

<sup>b</sup> Yuelushan Laboratory, Hongqi Road, Changsha, Hunan 410128, China

\*Corresponding authors at: College of Environment and Ecology, Hunan Agricultural University,  
Changsha 410128, PR China

E-mail addresses: [liang-123@hunau.edu.cn](mailto:liang-123@hunau.edu.cn) (Y. Liang).

Author Contributions D.L. and S.Y. contributed equally.

## List of Figures

**Fig. S1.** Scanning electron microscope (SEM) images of *B. subtilis* before and after the removal of EPS (a) (b), along with SEM images and XPS high resolution spectra of the extracted EPS (c) (d).

**Fig. S2.** XRD diffractograms of (a) Hema and Goet.

**Fig. S3.** Nitrogen adsorption isotherms at 77 K and BJH pore size distributions of Hema (a, c), Goet (b, d).

**Fig. S4.** FTIR spectra of Hema (a) and Goet (b) before and after EPS adsorption.

**Fig. S5.** 3D-EEM change of original EPS and EPS after equilibrium reaction with Hema and Goet where the sequence of #1~#5 shows the gradual increase of initial EPS concentration (10~80 mg C/L). H is represented Hema, G is represented Goet (background electrolyte was 0.01 M NaCl, temperature was  $25 \pm 1$  °C and pH was ~7.0).

**Fig. S6.** Loading plots of the four fluorescent components of EPS before and after adsorptive fractionation on mineral surfaces.

**Fig. S7.** Synchronous fluorescence spectra of EPS: (a) without mineral adsorptive fractionation; (b) after adsorptive fractionation on Hema; (c) after adsorptive fractionation on Goet.

**Fig. S8.** Loading plots of the four fluorescent components of EPS binding to Cu before and after adsorptive fractionation on mineral surfaces.

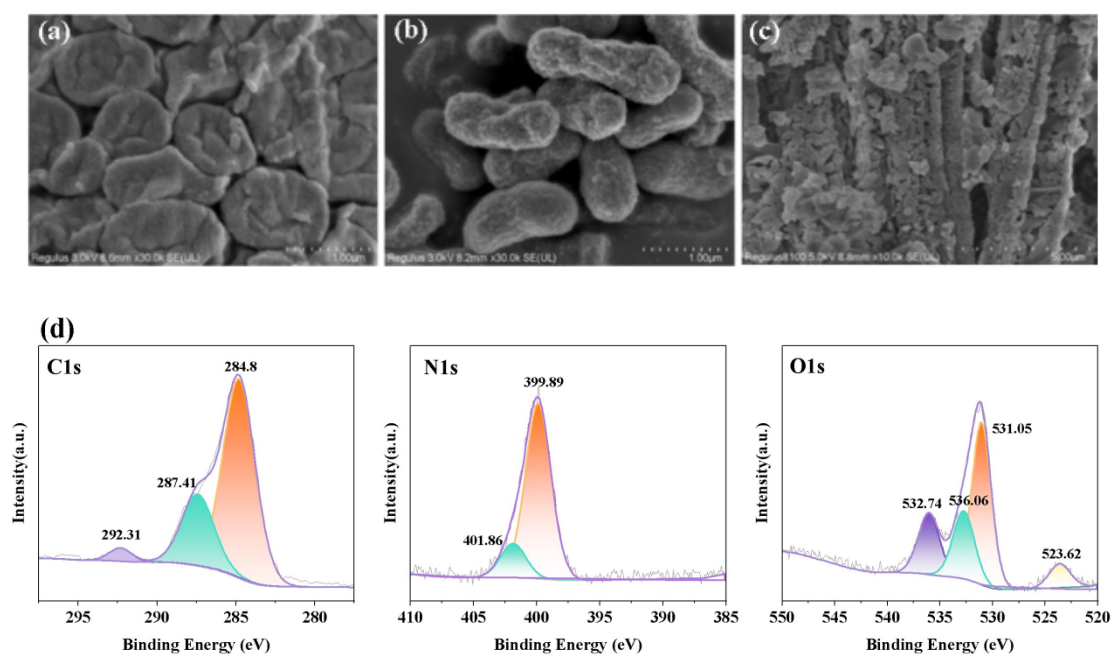

**Fig. S1.** Scanning electron microscope (SEM) images of *B. subtilis* before and after the removal of EPS (a) (b), along with SEM images and XPS high resolution spectra of the extracted EPS (c) (d).

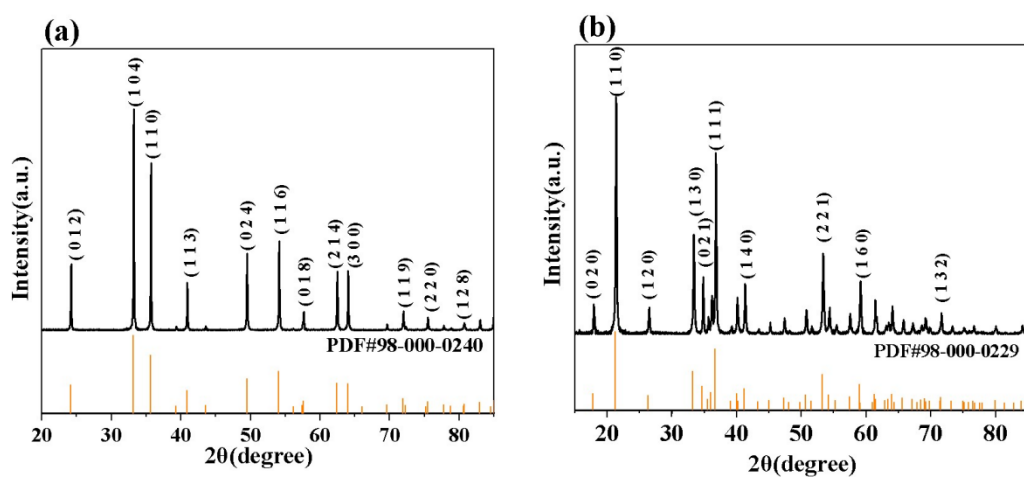

**Fig. S2.** XRD diffractograms of (a) Hema and Goet.

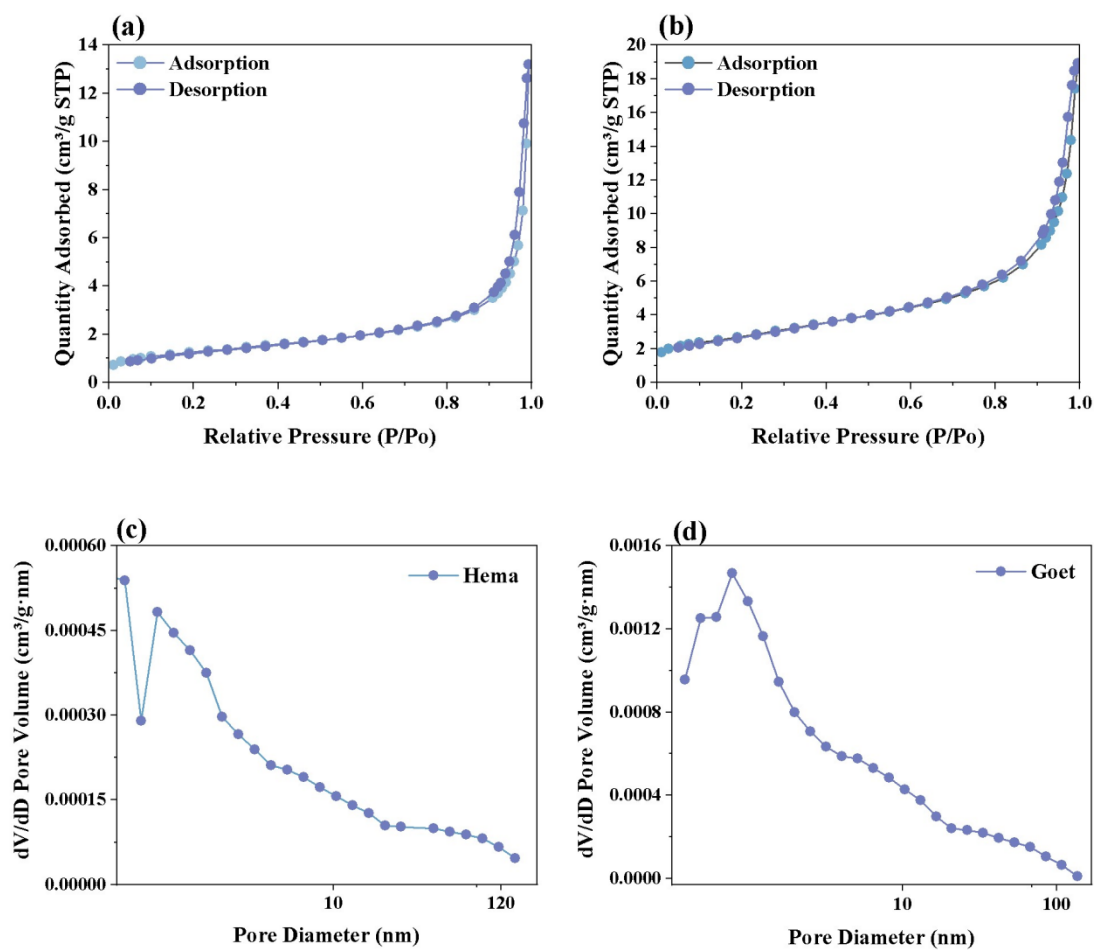

**Fig. S3.** Nitrogen adsorption isotherms at 77 K and BJH pore size distributions of Hema (a, c), Goet (b, d).

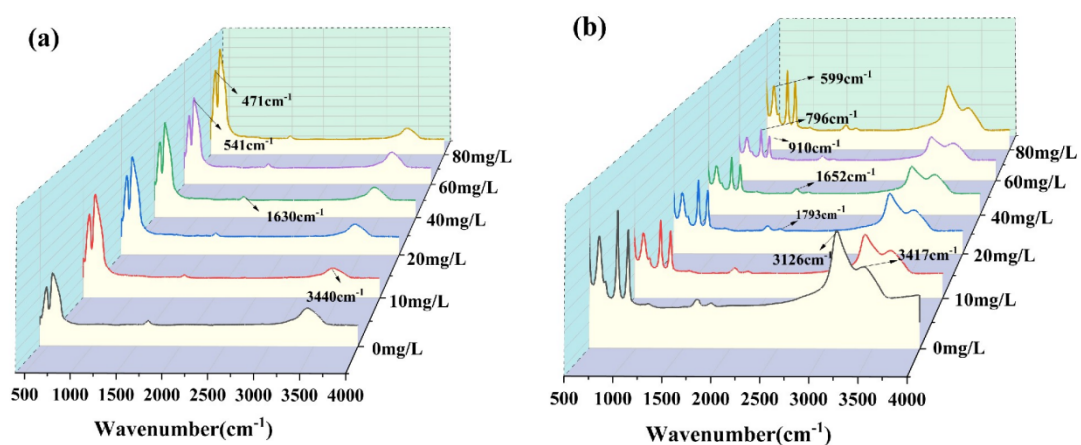

**Fig. S4.** FTIR spectra of Hema (a) and Goet (b) before and after EPS adsorption.

**Fig. S5.** 3D-EEM change of original EPS and EPS after equilibrium reaction with Hema and Goet where the sequence of #1~#5 shows the gradual increase of initial EPS concentration (10~80 mg C/L). H is represented Hema, G is represented Goet (background electrolyte was 0.01 M NaCl, temperature was  $25 \pm 1$  °C and pH was ~7.0).

**Fig. S6.** Loading plots of the four fluorescent components of EPS before and after adsorptive fractionation on mineral surfaces.

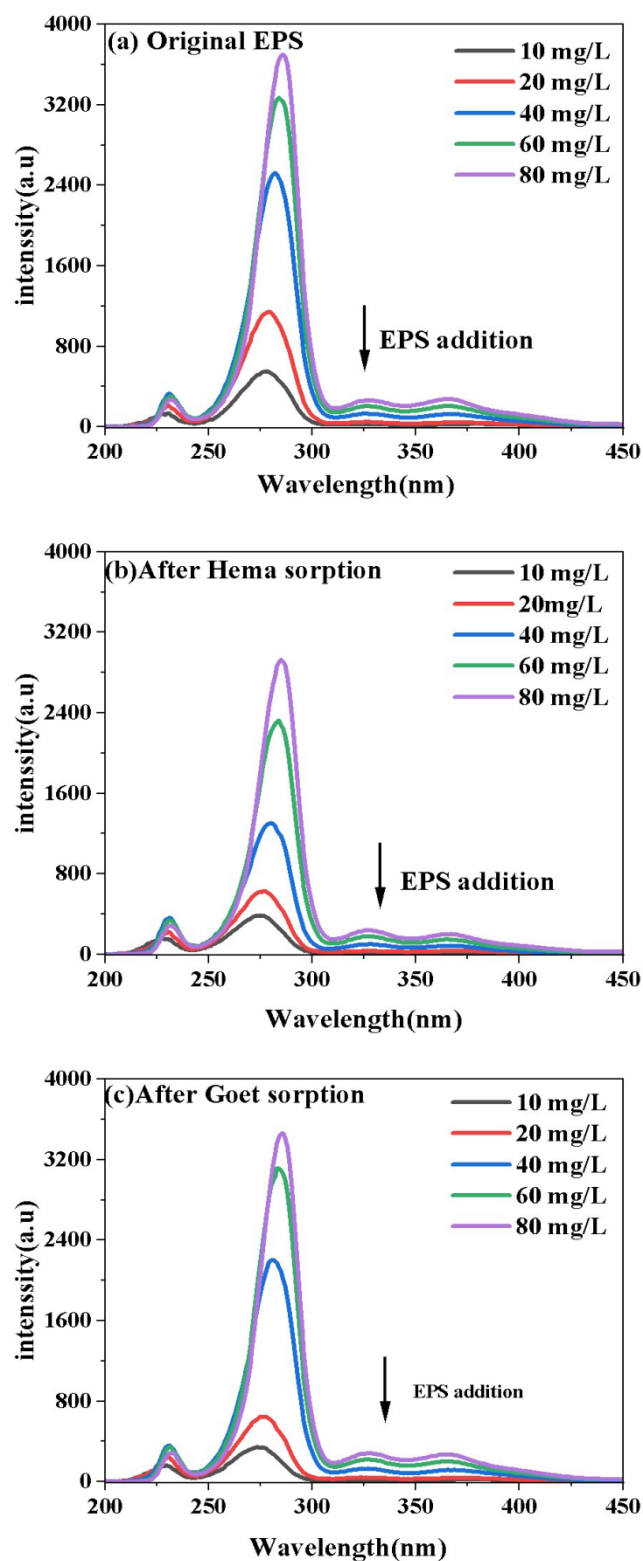

**Fig. S7.** Synchronous fluorescence spectra of EPS: (a) without mineral adsorptive fractionation; (b) after adsorptive fractionation on Hema; (c) after adsorptive fractionation on Goet.

**Fig. S8.** Loading plots of the four fluorescent components of EPS binding to Cu before and after adsorptive fractionation on mineral surfaces.



## **List of Tables**

**Table S1.** Surface characteristics of iron oxyhydroxides.

**Table S2.** PARAFAC components and their comparison to other studies.

**Table S3.** 2D-SF-COS results on the assignment and sign of each cross-peak in a synchronous map of EPS.

**Table S4.** PARAFAC components and their comparison to other studies.

**Table S5.** Cross-peak signs in the SF synchronous and asynchronous (in parentheses) maps of EPS fractions with Cu addition.

**Table S6.** Cross-peak signs in the FTIR synchronous and asynchronous (in parentheses) maps of EPS with Cu addition.

**Table S1.** Surface characteristics of iron oxyhydroxides.

|      | Specific Surface Area<br>(m <sup>2</sup> /g) | Pore Volume<br>(cm <sup>3</sup> /g) | Pore Size<br>(nm) |
|------|----------------------------------------------|-------------------------------------|-------------------|
| Hema | 4.5165 m <sup>2</sup> /g                     | 0.000337 cm <sup>3</sup> /g         | 18.0758 nm        |
| Goet | 9.6892 m <sup>2</sup> /g                     | 0.000102 cm <sup>3</sup> /g         | 12.0826 nm        |

\* The Brunauer–Emmett–Teller (BET) equation was used to calculate surface areas from the nitrogen isotherm data. Barrett, Barrett, Joyner, Halenda (BJH) theory was used to obtain mesopore (pore diameter 1.7–300 nm) distributions from the desorption branch of the nitrogen isotherm. BJH cumulative and differential pore volume distributions were determined for the desorption branch of the isotherm. (Fig. S3)

**Table S2.** PARAFAC components and their comparison to other studies.

| Component | Excitation<br>wavelength<br>(nm) | Emission<br>wavelength<br>(nm) | Interpretation                     | Literature        |
|-----------|----------------------------------|--------------------------------|------------------------------------|-------------------|
| C1        | 225/285                          | 340                            | Tryptophan-like,<br>protein-like   | C5 <sup>(1)</sup> |
| C2        | 220/275                          | 340                            | Tryptophan-like,<br>protein-like   | C1 <sup>(2)</sup> |
| C3        | 225/280                          | 305                            | Tyrosine-like,<br>protein-like,    | C1 <sup>(3)</sup> |
| C4        | 320                              | 425                            | Marine/<br>microbial<br>humic-like | C2 <sup>(4)</sup> |

**Table S3.** 2D-SF-COS results on the assignment and sign of each cross-peak in a synchronous map of EPS.

|          | Position   | Sign |      |      |     | Assignment  |
|----------|------------|------|------|------|-----|-------------|
|          | (v1/v2 nm) | 230  | 280  | 328  | 365 | of EPS      |
| EPS-Hema | 230        | +    |      |      |     | Tyrosine    |
|          | 280        | +(-) | +    |      |     | Tryptophan  |
|          | 328        | +(-) | +(-) | +    |     | Fulvic-like |
|          | 365        | +(-) | +(-) | +(-) | +   | Fulvic-like |
| EPS-Goet | 230        | +    |      |      |     | Tyrosine    |
|          | 280        | +(-) | +    |      |     | Tryptophan  |
|          | 328        | +(-) | +(-) | +    |     | Fulvic-like |
|          | 365        | +(-) | +(-) | +(-) | +   | Fulvic-like |
|          |            |      |      |      |     |             |

**Table S4.** PARAFAC components and their comparison to other studies.

| Component | Excitation wavelength (nm) | Emission wavelength (nm) | Interpretation                     | Literature        |
|-----------|----------------------------|--------------------------|------------------------------------|-------------------|
| C1        | 220/275                    | 340                      | Tryptophan-like, protein-like      | C1 <sup>(5)</sup> |
| C2        | 225/275                    | 305                      | Tyrosine-like, protein-like        | C7 <sup>(6)</sup> |
| C3        | 220/310                    | 290/370                  | Marine/<br>microbial<br>humic-like | C4 <sup>(7)</sup> |
| C4        | 270/355                    | 310/435                  | Fulvic acid-like component         | C3 <sup>(8)</sup> |

**Table S5.** Cross-peak signs in the SF synchronous and asynchronous (in parentheses) maps of EPS fractions with Cu addition.

|             | Position   | Sign |      |     | Assignment of<br>EPS |
|-------------|------------|------|------|-----|----------------------|
|             | (v1/v2 nm) | 230  | 280  | 328 |                      |
| EPS-Cu      | 230        | +    |      |     | Tyrosine             |
|             | 280        | +    | +    |     | Tryptophan           |
|             | 328        | +(-) | +(-) | +   | Fulvic-like          |
| EPS-Hema-Cu | 230        | +    |      |     | Tyrosine             |
|             | 280        | +(-) | +    |     | Tryptophan           |
|             | 328        | +(-) | +(-) | +   | Fulvic-like          |
| EPS-Goet-Cu | 230        | +    |      |     | Tyrosine             |
|             | 280        | +    | +    |     | Tryptophan           |
|             | 328        | +(-) | +(-) | +   | Fulvic-like          |

**Table S6.** Cross-peak signs in the FTIR synchronous and asynchronous (in parentheses) maps of EPS with Cu addition.

|        | Sites(cm <sup>-1</sup> ) | Assignment                                                                                               | Signs |      |      |      |      | References |
|--------|--------------------------|----------------------------------------------------------------------------------------------------------|-------|------|------|------|------|------------|
|        |                          |                                                                                                          | 620   | 1052 | 1400 | 1620 | 1706 |            |
| EPS-Cu | 620                      | ring vibrations from aromatic amino acids and nucleotides                                                | +     |      |      |      |      | (9)        |
|        | 1052                     | vibrations from the C-O-C rings and stretches of the P=O bond in the phosphate group from polysaccharide | +     | +    |      |      |      | (10)       |
|        | 1400                     | COO <sup>-</sup> stretches associated with amino acid                                                    | +     | +    | +    |      |      | (11)       |
|        | 1620                     | C=O extension of the amide I band                                                                        | +(-)  | +(-) | +(-) | +    |      | (11)       |
|        | 1706                     | C=O stretching vibration of free carboxylic groups                                                       | +     | +    | +(-) | +    | +    | (12)       |

|             | Sites( $\text{cm}^{-1}$ ) | Assignment                                                            | Signs |      |      |      | References |
|-------------|---------------------------|-----------------------------------------------------------------------|-------|------|------|------|------------|
|             |                           |                                                                       | 982   | 1070 | 1400 | 1620 |            |
| EPS-Hema-Cu | 982                       | O-P-O stretches associated with nucleic acids                         | +     |      |      |      | (13)       |
|             | 1070                      | C-O-C ring vibrations and C-OH stretches derived from polysaccharides | +(-)  | +    |      |      | (10)       |
|             | 1400                      | COO <sup>-</sup> stretches associated with amino acid                 | +(-)  | +    | +    |      | (11)       |
|             | 1620                      | C=O extension of the amide I band                                     | +(-)  | +(-) | +(-) | +    | (11)       |
|             | Sites( $\text{cm}^{-1}$ ) | Assignment                                                            | Signs |      |      |      | References |
|             |                           |                                                                       | 620   | 1052 | 1425 | 1620 |            |
|             | 620                       | ring vibrations from aromatic amino acids and nucleotides             | +     |      |      |      | (9)        |

---

---

|      |                                                                                                                    |      |      |   |   |      |
|------|--------------------------------------------------------------------------------------------------------------------|------|------|---|---|------|
| 1052 | vibrations from the C-O-C rings<br>and stretches of the P=O bond in<br>the phosphate group from<br>polysaccharides | +    | +    |   |   | (10) |
| 1425 | COO <sup>-</sup> stretches associated with<br>amino acid                                                           | +(-) | +(-) | + |   | (11) |
| 1620 | C=O extension of the amide I<br>band                                                                               | +    | +(-) | + | + | (11) |

---

## References

1. Sit I, Young MA, Kubicki JD, Grassian VH. Distinguishing different surface interactions for nucleotides adsorbed onto hematite and goethite particle surfaces through ATR-FTIR spectroscopy and DFT calculations. *Physical Chemistry Chemical Physics*. 2023;25(30):20557-66.
2. Cohen E, Levy GJ, Borisover M. Fluorescent components of organic matter in wastewater: Efficacy and selectivity of the water treatment. *Water Res*. 2014;55:323-34.
3. Garaba SP, Albinus M, Bonthond G, Flöder S, Miranda MLM, Rohde S, et al. Bio-optical properties of the cyanobacterium *Nodularia spumigena*. *Earth Syst Sci Data*. 2023;15(9):4163-79.
4. Liu C, Shen Q, Gu X, Zhang L, Han C, Wang Z. Burial or mineralization: Origins and fates of organic matter in the water-suspended particulate matter-sediment of macrophyte- and algae-dominated areas in Lake Taihu. *Water Res*. 2023;243.
5. Nimptsch J, Woelfl S, Osorio S, Valenzuela J, Ebersbach P, von Tuempling W, et al. Tracing dissolved organic matter (DOM) from land-based aquaculture systems in North Patagonian streams. *Sci Total Environ*. 2015;537:129-38.
6. Murphy KR, Hambly A, Singh S, Henderson RK, Baker A, Stuetz R, et al. Organic Matter Fluorescence in Municipal Water Recycling Schemes: Toward a Unified PARAFAC Model. *Environ Sci Technol*. 2011;45(7):2909-16.
7. Zhou X, Johnston SE, Bogard MJ. Organic matter cycling in a model restored wetland receiving complex effluent. *Biogeochemistry*. 2022;162(2):237-55.
8. Wang H, Wang Y, Zhuang WE, Chen W, Shi W, Zhu Z, et al. Effects of fish culture on particulate organic matter in a reservoir-type river as revealed by absorption spectroscopy and fluorescence EEM-PARAFAC. *Chemosphere*. 2020;239.
9. He C, He X, Yuan R, Li N, Jiang J. Binding characteristics of Pb and Zn to low-temperature feces-based biochar-derived DOM revealed by EEM-PARAFAC combined with general and moving-window two-dimensional correlation analyses. *Environ Sci Pollut Res*. 2022;30(10):27525-38.
10. Zhu Y, Jin Y, Liu X, Miao T, Guan Q, Yang R, et al. Insight into interactions of heavy metals with livestock manure compost-derived dissolved organic matter using EEM-PARAFAC and 2D-FTIR-COS analyses. *J Hazard Mater*. 2021;420.
11. Hu B, Wang P, Wang C, Qian J, Bao T, Shi Y. Investigating spectroscopic and copper-binding characteristics of organic matter derived from sediments and suspended particles using EEM-PARAFAC combined with two-dimensional fluorescence/FTIR correlation analyses. *Chemosphere*. 2019;219:45-53.
12. Li X, Yang J, Chen C, Vähätalo AV, Riise G, Liu C, et al. Effects of mineral adsorption on the molecular composition of soil dissolved organic matter: Evidence from spectral analyses. *Chem Geol*. 2024;669.
13. Li K, Yang S, Wang H, Wu Z, Liang Y, Gong X, et al. Molecular spectra and docking simulations investigated the binding mechanisms of tetracycline onto *E. coli* extracellular polymeric substances. *Talanta*. 2024;276.
